# Supplementary material
Source: ML conference proceedings conference paper supplement (https://openreview.net/forum?id=wEVqNPwG1i)
Supplement: supplementary_material [file neurips_2025.pdf › neurips_supplimentary/neurips_2025.pdf]

## A Useful Lemmas

**Lemma A.1.** (Chernoff bounds) ([23]) Let  $X_1, \dots, X_n \in \{0, 1\}$  be independent random variables for which  $\Pr[X_i = 1] = p$ . Let  $X = \sum_{i=1}^n X_i$  and  $\mu = \mathbb{E}[X]$ . Then, the following bounds hold.

- For any  $0 < \gamma \leq 1$ ,  $\Pr[X \geq (1 + \gamma)\mu] \leq e^{-\mu\gamma^2/3}$ .
- For any  $0 < \gamma < 1$ ,  $\Pr[X \leq (1 - \gamma)\mu] \leq e^{-\mu\gamma^2/2}$ .

## B Detailed related works

Clustering problems such as  $k$ -means and  $k$ -center are known to be NP-hard and constant factor approximation algorithms are known for these problems ([9, 15, 3]). [21] prove  $\Omega(nk)$  lower bound on the running time of any constant factor randomized approximation of  $k$ -means.  $k$ -means++ is a  $D^2$ -sampling based algorithm that gives an expected  $O(\log k)$ -approximation for  $k$ -means. ([2, 26]) show how to obtain a bi-criteria  $(2^{2z}, O(k))$ -approximation guarantee for the  $(k, z)$ -clustering problem.

Clustering problems have also been studied in semi-supervised settings. [19] give tight query complexity bounds for the cluster recovery problem with a membership-query oracle, that on a query with any two points, answers whether the points belong to the same cluster or not. When the goal is to obtain a good approximate clustering solution, a number of works [4, 20] study clustering problems assuming additional access to a noisy membership-query oracle, also known as the same-cluster query oracle. [14] study algorithms for  $k$ -means where noisy labels are provided for each input point using an adversarial or random perturbation of the labels. [6] initiate the study of clustering problems in the weak-strong oracle model and design constant approximation algorithms for  $k$ -means and  $k$ -center problems. They also prove that any constant factor approximation algorithm for  $k$ -means or the  $k$ -center problem requires  $\Omega(k^2)$  strong-oracle queries in the weak-strong model. [13] obtain the following results for clustering problems in a related model. They design constant factor approximation algorithms for  $k$ -means and  $k$ -center clustering problems given access to a *quadruplet oracle* that takes two pairs  $(x_1, y_1)$  and  $(x_2, y_2)$  of points as input and returns whether the pairwise distances are similar or far from each other.

## C Detailed Technical overview

In this section, we describe the main ideas of our algorithms for  $k$ -means and  $k$ -center problems in the weak-strong oracle model. One of the most widely used algorithms for  $k$ -means is the  $k$ -means++ seeding algorithm that works in  $k$  iterations. In the first iteration, it chooses a point uniformly at random. Each of the remaining  $(k - 1)$  iterations samples a point following a non-uniform and adaptive sampling distribution known as the  $D^2$  distribution that depends on the previously chosen centers. Sampling a point from the  $D^2$ -distribution is called  $D^2$ -sampling. The  $k$  points sampled using  $D^2$ -sampling are returned as the solution for  $k$ -means. The  $D^2$ -distribution is such that the probability of choosing a point  $x$  is proportional to the squared distance  $d(x, C)^2$ , where  $C$  is a set of chosen centers and  $d(x, C) = \min_{c \in C} d(x, c)$ . [2] showed a constant factor bi-criteria approximation for the oversampling version of  $k$ -means++ in which  $O(k)$  iterations of  $D^2$ -sampling are used.

One of the main contributions of this work is to show that one can adapt  $k$ -means++ to the weak-strong oracle model. It is easy to observe that one can simulate  $k$ -means++ in the strong-oracle model using  $O(nk)$  strong-oracle queries. However, things become complicated in the weak-strong model, in which the distances returned by the weak-oracle cannot be trusted. To construct the  $D^2$ -sampling distribution, one must calculate  $d(x, C)$  for any point  $x$  and any set  $C$  of centers. Since  $d(x, C) = \min_{c \in C} d(x, c)$ , if we want to compute this distribution exactly, it would require  $\Omega(nk)$  strong-oracle queries. Since we don't want to use too many strong-oracle queries, we proceed as follows. Using weak-oracle query answers, we compute an estimate  $d_{km}^{est}(x, C)$  such that with high probability,  $d(x, C)$  and  $d_{km}^{est}(x, C)$  are within some small additive factor. We construct the sampling distribution to be used by the algorithm using these  $d_{km}^{est}(x, C)$  values for all points  $x$ .

Let us see how we compute  $d_{km}^{est}(x, C)$  for all  $x \in X$ . The main idea here is to exploit the fact that the weak-oracle distances are wrong independently with probability  $\delta < 1/2$ . Consider any  $c \in C$ . Let us obtain an estimate on  $d(x, c)$  using only weak-oracle queries. Suppose there are

many points in a ball  $B(c, r_c)$  around center  $c$  of radius  $r_c$  for a reasonably small value of  $r_c$ . More specifically, suppose  $r_c$  is such that  $B(c, r_c)$  contains  $\Omega(\log n)$  points. Then, the key idea is that the median of the weak-oracle distance queries on pairs  $(x, y)$  with  $y \in B(c, r_c)$  is a good estimate on  $d(x, c)$ . More formally, we use  $d_{km}^{est}(x, c) = \text{median}\{WO(x, y) : y \in B(c, r_c)\}$  as an estimate for  $d(x, c)$ . We note that [6] also uses the median of query answers to estimate  $d(x, c)$ . However, their algorithm used these values differently, as we will see in the remaining discussion. Since each weak-oracle query answer is wrong independently with probability at most  $1/2$ , using Chernoff bounds, one can show that for sufficiently large-sized ball  $B(c, r_c)$ , with high probability,  $|d(x, c) - d_{km}^{est}(x, c)| \leq r_c$ . Now, to approximate  $d(x, C)$ , we compute  $d_{km}^{est}(x, c) + r_c$  for all  $c \in C$  and set  $d_{km}^{est}(x, C) = \min_{c \in C} \{d_{km}^{est}(x, c) + r_c\}$ . Once we have the sampling distribution  $\widetilde{D}^2$  for which a point  $x$  is sampled with probability proportional to  $d_{km}^{est}(x, C)^2$ , we show that the approach of [2] can be adapted to obtain a constant factor bi-criteria approximation for  $k$ -means that succeeds with high probability. Even though the analysis becomes non-trivial and we incur an approximation loss, the high-level analysis ideas of [2] goes through.

The main idea is to run the oversampling  $k$ -means++ where we iteratively sample and update the center set  $C$ . However, the sampling is with respect to  $d_{km}^{est}(x, C)^2$  instead of  $d(x, C)^2$ . The goal is to pick a good center from every optimal cluster. Let us see why oversampling using  $d_{km}^{est}(x, C)^2$  will be sufficient to find good centers from every optimal cluster, and hence obtain a good approximation guarantee. For the simplicity of discussion, let us first assume that every optimal cluster has  $\Omega(\log n)$  points. We will later see how to drop this assumption. Let us draw a parallel with oversampling  $k$ -means++ that samples using accurate distance values. Why does it manage to pick good centers from every optimal cluster? Consider an intermediate center set  $C$ . Certain optimal clusters will have a good representative center in  $C$ , whereas others remain ‘uncovered’. Sampling using the  $D^2$  distribution boosts the probability of sampling from an uncovered cluster, so there is a good chance that the next sample belongs to an uncovered cluster. Moreover, we can argue that given the next sample is from an uncovered cluster, there is a good chance that it will be a good center from that cluster. Let’s see whether the same argument applies when sampling uses  $d_{km}^{est}(x, C)^2$  instead of  $d(x, C)^2$ . If our center set  $C$  has a single good center (or a few) from an optimal cluster, say  $A$ , can we consider the cluster to be covered? No. The probability of sampling from  $A$  may remain high since the distance estimate of points in  $A$  to the centers in  $C \cap A$  may be completely off. When does the distance estimate start becoming tighter? This happens when there are  $\Omega(\log n)$  good centers from  $A$  in  $C$ . This is when we can call the cluster  $A$  ‘settled’. So, instead of ‘covering’ every cluster (if correct distances are known), we care about ‘settling’ every cluster in our current model. So, let us see if we can settle every cluster if we keep sampling centers. We can show that unless the current center set  $C$  is already good, there is a good chance that the next center will be sampled from one of the unsettled optimal clusters. Further, we can also argue that conditioned on sampling from an unsettled cluster, there is a good chance that the sampled center will be a good center (i.e., reasonably close to the optimal center). So, as long as we sample sufficiently many centers, every optimal cluster will get settled with high probability. The oversampling factor is  $O(\log n)$ , i.e., we end up with a centre set  $C$  with  $O(k \log n)$  centers. Finally, we will use  $d_{km}^{est}(x, C)$  to assign points  $x$  to centers and create a weighted point set  $C$  (the weight of a point in  $C$  is the number of points assigned to it), on which a standard constant approximation algorithm using strong-oracle queries is used to find the final set of  $k$  centers. Since the set  $C$  has  $O(k \log n)$  points, we will need  $O(k^2 \log^2 n)$  strong oracle queries to find all the interpoint distances to run the constant approximation algorithm as well as the distance estimates. Using known techniques, it can be shown that this final center set gives a constant approximation. To drop the assumption that all optimal clusters have  $\Omega(\log n)$  points, we argue if an optimal cluster does not have adequate points, the oversampling procedure will sample *all* the points from that cluster with high probability, which is also a favourable case.

For the  $k$ -center problem, we design a simple ball carving algorithm that gives a  $6(1 + \varepsilon)$ -approximate solution. For the current discussion, we will make the simplifying assumptions that the optimal radius  $R$  is known. We will later see how to drop these assumptions. We will design a ball carving procedure that runs in  $k$  iterations and is guaranteed to carve out all the points of a new optimal cluster in every round. Carving out a ball means picking a center  $c$  and removing all points within a ball of appropriate radius centered at  $c$ . As we did for the  $k$ -means problem, we’ll draw a parallel with the ball carving procedure that works when distances are accurately known. In the perfect case, suppose we pick an arbitrary point as center in each round and carve out the ball of radius  $2R$  in every round. For any optimal cluster  $A$  and any point  $a \in A$ , a ball of radius  $2R$  will contain all points in  $A$ . So, in

every round, the center  $c$  is guaranteed to belong to a previous uncarved ball and we are guaranteed to carve out all points in the optimal cluster to which  $c$  belongs. So, in  $k$  iterations, we will carve out all points within radius  $2R$ . This gives us a 2-approximate solution. Let's see if the same argument applies to our current weak-strong oracle model. The main issue while carving a ball centered at the next chosen center  $c$  is that we may not have accurate distance estimates. What should be the appropriate center  $c$  and the appropriate radius  $r$  so that if we carve out all points whose distance estimate to  $c$  is within  $r$ , then all points from the optimal cluster to which  $c$  belongs get removed? Suppose all points from  $i - 1$  optimal clusters have been carved out in the first  $i - 1$  iterations. Let's focus on the  $i^{th}$  iteration. If only a few points are remaining, then we can find the centers using strong queries for all remaining points. Let us assume that at least  $\Omega(k \log n)$  points remain. We can argue that if we randomly sample a set  $T$  of  $\Omega(k \log n)$  points from the remaining set of points, then there is a point  $c \in T$  such that there are  $\Omega(\log n)$  points in  $B(c, 2R) \cap T$ . We can use strong-oracle queries on the set  $T$  to locate center  $c$  and  $\Omega(\log n)$  points from  $T$  within  $2R$  of  $c$ . Let  $c$  belong to the optimal cluster  $A$ . So, if we consider the closest  $O(\log n)$  points to  $c$  when calculating the median distance (this is the same as we did for  $k$ -means), then our distance estimate is off by an additive factor of  $2R$ . This means that if we carve out all points within the estimated distance  $4R$  from  $c$ , it is guaranteed to remove all points in  $A$ . However, the removed points may also include points with true distance  $6R$  away from  $c$ , which gets assigned to  $c$ . So, we will end with an approximation guarantee of 6. What is the number of strong oracle queries required for the procedure? In each round, we need  $O(k^2 \log^2 n)$  strong queries and there are  $k$  rounds. So, the total number of strong queries is  $O(k^3 \log^2 n)$ . How do we remove the assumption that the optimal radius  $R$  is known? This is done by guessing the radius using binary search in an appropriate range and out of a discrete set of possibilities determined by the error parameter  $\varepsilon > 0$ . This makes the approximation guarantee  $6(1 + \varepsilon)$  and adds a multiplicative factor of  $\log \frac{\log n}{\varepsilon}$  to the number of strong oracle queries.

Bateni *et al.* [6] show a  $\Omega(k^2)$  strong-oracle query lower bound in the weak-strong model for any constant factor approximation of  $k$ -means or  $k$ -center problems. However, no such weak-oracle query lower bound was known for  $k$ -means. In this work, we show a  $\Omega(\frac{nk}{(1-2\delta)^2})$  weak-oracle query lower bound for any constant approximation of  $k$ -means in the weak-oracle model. To show this lower bound, we use a known  $\Omega(\frac{nk}{(1-2\delta)^2})$  query lower bound of [20] for the cluster recovery problem using a faulty query oracle.

## D Clustering in Strong-oracle Model

### D.1 Algorithm for $k$ -means clustering

**Theorem D.1.** *There exists an algorithm that makes  $O(nk)$  strong-oracle queries and returns a constant factor bi-criteria approximation for  $k$ -means with constant probability.*

*Proof.* We show that the oversampling  $k$ -means++ algorithm, which samples centers using  $D^2$ -sampling for  $O(k)$  iterations, can be simulated using  $O(nk)$  strong-oracle queries. Recall that oversampling  $k$ -means++ starts with a center  $c_1$  chosen uniformly at random and initializes a center set  $C = c_1$ . We query the strong-oracle with  $(x, c_1)$  for all  $x \in X$  to obtain  $SO(x, c_1)$  for all  $x \in X$ , and construct the  $D^2$ -sampling distribution. This step requires  $O(n)$  strong-oracle queries. In the second iteration, the oversampling  $k$ -means++ algorithm samples a center  $c_2$  following  $D^2$ -distribution with respect to  $C = \{c_1\}$ . We update  $C = C \cup \{c_2\}$ . We again query the strong-oracle for  $x \in X$  and  $c_2$ , and update the sampling distribution using the query results. In this manner for  $O(k)$  iterations, we make in total  $O(nk)$  strong-oracle queries and using the query results, run the oversampling  $k$ -means++ algorithm. Following [2], oversampling  $k$ -means++ gives a constant approximation for  $k$ -means with constant probability.  $\square$

The above bound on the number of strong-oracle queries is tight for a constant factor approximation of  $k$ -means, following a known lower bound [21].

**Theorem D.2.** *Any randomized algorithm that provides a constant-factor approximation for the  $k$ -means problem with constant probability requires  $\Omega(nk)$  strong-oracle queries.*

*Proof.* Mettu and Plaxton [21] prove a  $\Omega(nk)$  lower bound on the running time of any constant factor randomized approximation of  $k$ -means. The  $\Omega(nk)$  query lower bound result follows from this lower bound of [21].  $\square$

## D.2 Algorithm for $k$ -center clustering

**Theorem D.3.** *There exists a 2-approximation algorithm for the  $k$ -center problem using  $O(nk)$  queries.*

*Proof.* We observe that the farthest-point algorithm of [15] can be implemented using only  $O(nk)$  strong-oracle queries. This will give a 2-approximation for the  $k$ -center problem.  $\square$

## E Algorithm for $k$ -means in weak-strong oracle model

For ease of reading, we reproduce here the entire algorithm for  $k$ -means clustering and its analysis. In this section, we design a constant factor bi-criteria approximate solution for  $k$ -means in the weak-strong oracle model with the assumption that all optimal clusters have size at least  $\frac{480 \log n}{\epsilon}$ . We remove this assumption later. We prove the following result.

**Theorem E.1.** *Let  $\epsilon \in (0, 1)$ ,  $\delta \leq 1/3$ . There exists a randomized algorithm for  $k$ -means that makes  $O(\frac{k^2 \log^2 n}{\epsilon^4})$  strong-oracle queries and  $O(\frac{nk \log n}{\epsilon^2})$  weak-oracle queries to give a  $(O(\frac{\log n}{\epsilon^2}), 40(1 + \epsilon))$  bi-criteria approximation for  $k$ -means and succeeds with constant probability, assuming every optimal cluster has size at least  $\frac{480 \log n}{\epsilon}$ .*

### E.1 Algorithm and analysis

Since the weak-oracle gives a wrong answer to a query independently with probability  $\delta < 1/2$ , we define an alternate distance measure between points and a set of centers that we use in our algorithm. Let  $C$  denote a set of centers. For any  $x \in X$  and any  $c \in C$ , we query for the distance between  $x$  and  $c$  to the weak oracle  $\widetilde{WO}$  to obtain a possibly wrong answer  $\widetilde{WO}(x, c)$ . For any fixed  $x$ , we query the weak-oracle for each center  $c$  in  $C$ , and use these query answers  $\widetilde{WO}(x, c)$  to come up with an upper bound on the distance between a point  $x$  and a set  $C$  of centers defined as follows. We use  $\delta \leq 1/3$  for this discussion.

**Definition E.1.** *Let  $x$  and  $y$  be any two points in  $X$  and we want to estimate the distance between  $x$  and  $y$ . Let radius  $r_y \geq 0$  be such that the ball  $B(y, r_y)$  contains at least  $180 \log n$  points. Then, for any  $x \in X$ , we define the distance from  $x$  to  $y$  as  $d_{km}^{est}(x, y) = \text{median}\{\widetilde{WO}(x, z) | z \in B(y, r_y)\}$ .*

We make the following claim with respect to the above distance measure. A similar lemma was proved in [6]. We add a proof here for completeness.

**Lemma E.1.** *Following Definition E.1, for any  $x \in X$ , with probability at least  $(1 - \frac{1}{n^5})$ , we have  $|d_{km}^{est}(x, y) - d(x, y)| \leq r_y$ .*

*Proof.* Let us consider the ball  $B(y, r_y)$  centered at  $y$  and radius  $r_y \geq 0$ . By definition,  $B(y, r_y)$  has at least  $l = 180 \log n$  points inside it. For each point  $z \in B(y, r_y)$ , the weak-oracle returns a wrong answer for  $\widetilde{WO}(x, z)$  with probability  $\delta \leq 1/3$ . Hence, the expected number of wrong answers is at most  $l/3$ . For each query to the weak-oracle with  $x$  and  $z \in B(y, r_y)$ , we have  $|\widetilde{WO}(x, z) - d(x, z)| > r_y$  with probability at most  $1/3$ . For the median of the query answers  $d_{km}^{est}(x, y) = \text{median}\{\widetilde{WO}(x, z) : z \in B(y, r_y)\}$  to satisfy  $|d_{km}^{est}(x, y) - d(x, y)| > r_y$ , we need at least half of the query answers  $\widetilde{WO}(x, z)$  to satisfy  $|\widetilde{WO}(x, z) - d(x, z)| > r_y$ . Using Lemma A.1, this probability is at most  $e^{-1/3 \cdot 1/4 \cdot l/3} \leq 1/n^5$ .  $\square$

We use the above definition to come up with an upper bound on the distance between a point  $x$  and a set  $C$  of centers. For any  $c \in C$ , let  $r_c$  denote a radius such that  $B(c, r_c)$  has at least  $180 \log n$  points inside it. We use Definition E.1 to come up with an upper bound on the distance between  $x$  and any  $c \in C$  as  $d_{km}^{est}(x, c) + r_c$ . Following Lemma E.1, with high probability, this upper bound holds. That

is, with high probability,  $d(x, c) \leq d_{km}^{est}(x, c) + r_c$ . Using an union bound over all  $c \in C$ , all these upper bounds hold and hence, the minimum of these upper bounds would also hold. This motivates the following definition on the distance between a point  $x$  and a set  $C$  of centers.

**Definition E.2.** Let  $x$  be any point in  $X$  and let  $C$  be a set of centers of size at least  $180 \log n$ . For any  $c \in C$ , let  $r_c$  denote a radius value such that the ball  $B(c, r_c)$  contains at least  $180 \log n$  points. We define the distance between  $x$  and  $C$  as  $d_{km}^{est}(x, C) = \min_{c \in C} \{d_{km}^{est}(x, c) + r_c\}$ .

We state the following lemma with respect to the above distance measure.

**Lemma E.2.** Let  $x$  be any point in  $X$  and let  $C$  denote a set of centers of size at least  $180 \log n$ . Then, with probability at least  $(1 - 1/n^4)$ ,  $d(x, C) \leq d_{km}^{est}(x, C)$ . In other words, with probability at least  $(1 - 1/n^4)$ , there exists a center  $c \in C$  within a distance of  $d_{km}^{est}(x, C)$  from  $x$ .

*Proof.* Let  $x$  be any point in  $X$ . Using Lemma E.1, for any  $c \in C$ , we have with probability at least  $(1 - 1/n^5)$ ,  $d_{km}^{est}(x, c) + r_c \geq d(x, c)$ . Using a union bound over all  $c \in C$ , with probability at least  $(1 - 1/n^4)$ , all these upper bounds on  $d(x, c)$  hold. Hence,  $d_{km}^{est}(x, C) = \min_{c \in C} \{d_{km}^{est}(x, c) + r_c\} \geq \min_{c \in C} d(x, c) = d(x, C)$ , with probability at least  $(1 - 1/n^4)$ . Since with probability at least  $(1 - 1/n^4)$ , these upper bounds  $d(x, c) \leq d_{km}^{est}(x, c) + r_c$  hold for  $c \in C$ , and the minimum over these upper bounds also hold. This implies that with this probability, there exists a center  $c \in C$  within distance  $d_{km}^{est}(x, C)$  from  $x$ .  $\square$

**Estimating  $d_{km}^{est}(x, C)$  in weak-strong oracle model** Next, we describe how we estimate  $d_{km}^{est}(x, C)$  for all  $x \in X$  in the weak-strong oracle model. We assume that there are at least  $180 \log n$  centers in  $C$ . Consider any  $c \in C$ . We query the strong-oracle  $SO$  with all pairs  $c_i, c_j \in C$  to obtain the exact distances between centers  $c_i$  and  $c_j$  as  $SO(c_i, c_j)$ . For each  $c \in C$ , we find the smallest  $r_c$  such that  $B(c, r_c)$  contains at least  $180 \log n$  points in  $C$ . Consider any  $x \in X$  for which we want to estimate  $d_{km}^{est}(x, C)$ . We query the weak-oracle with  $x$  and  $y \in B(c, r_c)$  to obtain  $\widetilde{WO}(x, y)$  for all  $y \in B(c, r_c)$ , and use these weak-oracle query answers to compute  $d_{km}^{est}(x, c)$  following Definition E.1. We compute  $d_{km}^{est}(x, c)$  for all  $c \in C$ . Finally, to compute  $d_{km}^{est}(x, C)$ , we find the minimum over all  $c \in C$  of  $d_{km}^{est}(x, c) + r_c$ , as mentioned in Definition E.2.

---

**Algorithm 3:** Algorithm for  $k$ -means in weak-strong oracle model

---

**Input :** Dataset  $X$  and an integer  $k > 0$ ,  $\epsilon \in (0, 1)$ ,  $\delta = 1/3$ .

**Output :** A set of  $O(\frac{k \log n}{\epsilon^2})$  centers and an assignment of  $x \in X$  to centers.

▷ Let  $C_1$  be a set of  $180 \log n$  points chosen arbitrarily from  $X$ ;

Set  $t = \frac{4320 \cdot 800000}{\epsilon^2} \cdot k \log n$ ;

**for**  $i = 1$  **to**  $t$  **do**

▷ For each  $x \in X$ , compute  $d_{km}^{est}(x, C_i)$  following Definition E.2.;

▷ Construct distribution  $\widetilde{D}^2$  that samples a point  $x \in X$  with probability proportional to  $d_{km}^{est}(x, C_i)^2$ ;

▷ Sample a point  $s_i \in X$  using distribution  $\widetilde{D}^2$ ;

▷ Make a strong-oracle query with  $SO(s_i, c)$  for all  $c \in C_i$ ;

▷ Update  $C_{i+1} \leftarrow C_i \cup \{s_i\}$ .

**end**

▷ Let  $\{c_1, c_2, \dots, c_h\}$  be an arbitrary ordering of the centers in  $C_{t+1}$ , where  $h = 180 \log n + t$ .

▷ Initialize weights  $w(c_i) = 0$  for  $i \in [h]$ .

**for**  $x \in X$  **do**

▷ Compute  $d_{km}^{est}(x, C_{t+1})$  and determine  $c_x$  for which the minimum is achieved in Definition E.2.;

▷ Assign  $x$  to  $c_x$ ;

▷ Update  $w(c_x) \leftarrow w(c_x) + 1$ .

**end**

**return**  $C_{t+1}$  and the assignment of each  $x \in X$  to a center in  $C_{t+1}$ .

---

Let  $C$  be any set of centers of size at least  $180 \log n$ . Let  $\widetilde{D}^2$  denote the proportional sampling distribution over points in  $X$  with respect to  $C$ . The probability of sampling a point  $x \in X$  following

distribution  $\widetilde{D}^2$  is proportional to  $d_{km}^{est}(x, C)^2$ . For any point  $x \in X$ , the probability of sampling  $x$  with respect to  $C$  is given as  $\frac{d_{km}^{est}(x, C)^2}{\sum_{x' \in X} d_{km}^{est}(x', C)^2}$ . Using Lemma E.2 with a union bound over all points  $x \in X$ , we have that with probability at least  $(1 - \frac{1}{n^3})$ , the distance estimates  $d_{km}^{est}(x, C)$  given by Definition E.2 provide valid upper bounds for  $d(x, C)$  for all  $x \in X$ . For the following discussion, we condition on this high probability event  $\mathcal{E}$ .

**Lemma E.3.** *Let  $C$  be any set of centers of size at least  $180 \log n$ . Let  $\mathcal{E}$  denote the event that  $d_{km}^{est}(x, C) \geq d(x, C)$  for all points  $x \in X$ . Then,  $\mathcal{E}$  holds with probability at least  $1 - 1/n^3$ .*

*Proof.* The proof follows by using Lemma E.2 for all  $x \in X$  and applying a union bound.  $\square$

Since we do not know the exact distances for most pairs of points in a cluster, we define below the cost of a cluster using the distance estimates defined in Definition E.2.

**Definition E.3.** (*Cost of a cluster*) *Let  $A$  be any optimal cluster and let  $C$  denote a set of centers. Then, the cost of cluster  $A$  with respect to center set  $C$  is given as  $\tilde{\Phi}(A, C) = \sum_{x \in A} d_{km}^{est}(x, C)^2$ .*

We next define the notion of *settled* clusters that give good approximation guarantees with respect to the set  $C$  of centers chosen by the algorithm.

**Definition E.4.** (*Settled clusters*) *Let  $C$  be a set of centers. An optimal cluster  $A$  is said to be settled with respect to  $C$  if  $\tilde{\Phi}(A, C) \leq 20(1 + \epsilon) \cdot OPT(A)$ . Otherwise, the cluster  $A$  is said to be unsettled.*

Let  $C_{i-1}$  denote the set of centers at the end of iteration  $(i - 1)$ . Let  $A$  be an optimal cluster. Let the set of *settled* optimal clusters at the start of iteration  $i$  be given as  $G_i = \{A : \tilde{\Phi}(A, C_{i-1}) \leq 20(1 + \epsilon) \cdot OPT(A)\}$  and the set of *unsettled* optimal clusters be given as  $B_i = \{A : \tilde{\Phi}(A, C_{i-1}) > 20(1 + \epsilon) \cdot OPT(A)\}$ .

**Lemma E.4.** *During the  $i^{th}$  iteration of Algorithm 3, either  $\tilde{\Phi}(X, C_{i-1}) \leq 40(1 + \epsilon) \cdot OPT$  or the probability of sampling a center from some unsettled optimal cluster  $A \in B_i$  using distribution  $\widetilde{D}^2$  is at least  $1/2$ .*

*Proof.* If  $\tilde{\Phi}(X, C_{i-1}) \leq 40(1 + \epsilon) \cdot OPT$ , then  $C_{i-1}$  gives a  $40(1 + \epsilon)$ -approximation. For the following, we assume  $\tilde{\Phi}(X, C_{i-1}) > 40(1 + \epsilon) \cdot OPT$ . We show the probability of sampling a point from an unsettled optimal cluster  $A \in B_i$  is at least  $1/2$ . Let  $x$  be a point sampled using distribution  $\widetilde{D}^2$ . Then,

$$\begin{aligned} \Pr(x \in A, A \in B_i) &= \frac{\sum_{A \in B_i} \tilde{\Phi}(A, C_{i-1})}{\tilde{\Phi}(X, C_{i-1})} \\ &= 1 - \frac{\sum_{A \in G_i} \tilde{\Phi}(A, C_{i-1})}{\tilde{\Phi}(X, C_{i-1})} \\ &\geq 1 - 20(1 + \epsilon) \cdot \frac{\sum_{A \in G_i} OPT(A)}{40(1 + \epsilon) \cdot OPT} \\ &\geq 1 - 1/2 = 1/2 \end{aligned}$$

This completes the proof of the lemma.  $\square$

Let  $A \in B_i$  be an unsettled optimal cluster. Let  $\mu_A$  be the centroid of  $A$ . We define  $r$  to be the average radius of cluster  $A$  given as  $r = \sqrt{OPT(A)/|A|}$ . We define an inner ring  $IR(A, \alpha)$  around  $\mu_A$  of radius  $\alpha r$ , for some  $\alpha > 1$  to be chosen later. Formally,  $IR(A, \alpha) = \{x \in A : \|x - \mu_A\| \leq \alpha r\}$ .

One of the main ideas in the analysis of Algorithm 3 is to show that once we sample at least  $180 \log |A|$  centers from the inner ring of an unsettled optimal cluster  $A$ , the cost of cluster  $A$  with respect to the set of centers becomes at most a constant times its optimal cost  $OPT(A)$  with high probability. Fix any point  $x \in A$ . Let  $C_i$  denote the set of centers at the end of iteration  $i$  such that it contains at least  $180 \log |A|$  points from the inner ring  $IR(A, \alpha)$  of the optimal cluster  $A$ . Using arguments similar to Lemma E.3, we can show with probability at least  $(1 - 1/|A|^3)$ , there exists a center  $c_x$  in  $C_i$  within distance  $d_{km}^{est}(x, C_i)$  from  $x$  and this holds for all  $x \in A$ . Since  $C_i$  has at

least  $180 \log |A|$  points from the inner ring of  $A$ , with probability at least  $(1 - 1/|A|^3)$ , the distance  $d_{km}^{est}(x, C_i)$  from  $x$  to  $c_x$  is at most the distance from  $x$  to its farthest point in the inner ring of  $A$  plus the diameter of the inner ring. This corresponds to  $c_x \in C_i \cap IR(A, \alpha)$  being the farthest point in the inner ring from  $x$  and  $r_{c_x} \leq 2\alpha r$ .

**Lemma E.5.** *Let  $C_{i-1}$  denote the set of sampled centers at the end of iteration  $(i-1)$ , and let us assume that during iteration  $i$ , we have sampled a point such that  $C_i$  has at least  $180 \log n$  points from the inner ring  $IR(A, \alpha)$  of  $A$ , where  $A$  is an unsettled optimal cluster with respect to  $C_{i-1}$ . For  $\alpha > 1$ , we have  $\tilde{\Phi}(A, C_i) \leq 2(1 + 9\alpha^2) \cdot OPT(A)$  with probability at least  $(1 - 1/|A|^3)$ .*

*Proof.* Following Lemma E.3, with probability at least  $(1 - 1/n^3)$ , for all points  $x \in A$ , we have  $d_{km}^{est}(x, C_i)$  to be at most  $d_{km}^{est}(x, c_x) + r_{c_x}$ , where  $c_x \in C_i \cap IR(A, \alpha)$  with radius  $r_{c_x} \leq 2\alpha r$ . We have the following.

$$\begin{aligned}
\tilde{\Phi}(A, C_i) &= \sum_{x \in A} d_{km}^{est}(x, C_i)^2 \\
&\leq \sum_{x \in A} (d(x, c_x) + 2\alpha r)^2, \text{ where } c_x \in C_i \cap IR(A, \alpha) \\
&\leq \sum_{x \in A} (d(x, \mu_A) + 3\alpha r)^2 \\
&\leq \sum_{x \in A} [2d^2(x, \mu_A) + 18\alpha^2 r^2] \\
&\leq 2OPT(A) + 18 \sum_{x \in A} (\alpha r)^2 \\
&\leq 2OPT(A) + 18 \cdot |A| \cdot \alpha^2 \frac{OPT(A)}{|A|} = 2(1 + 9\alpha^2) \cdot OPT(A)
\end{aligned}$$

This completes the proof of the lemma.  $\square$

Next, we show that the probability of sampling a point following distribution  $\widetilde{D}^2$  from the inner ring  $IR(A, \alpha)$  of an unsettled optimal cluster  $A$  is not too small. First, we show that the inner ring of an unsettled optimal cluster  $A$  contains a significant fraction of points of  $A$ .

**Lemma E.6.** *For any unsettled optimal cluster  $A$ , there are at least  $|A|(1 - \frac{1}{\alpha^2})$  points in the inner ring  $IR(A, \alpha)$  of that cluster, where  $\alpha > 1$ .*

*Proof.* We have:

$$\begin{aligned}
OPT(A) &\geq \sum_{x \in A \setminus IR(A, \alpha)} \|x - \mu_A\|^2 \\
&\geq |A \setminus IR(A, \alpha)|(\alpha r)^2 \\
&= \left(1 - \frac{|IR(A, \alpha)|}{|A|}\right) |A|(\alpha r)^2 \\
&= \left(1 - \frac{|IR(A, \alpha)|}{|A|}\right) \alpha^2 OPT(A)
\end{aligned}$$

Rearranging terms, we get  $|IR(A, \alpha)| \geq |A|(1 - \frac{1}{\alpha^2})$ .  $\square$

Lemma E.6 tells us that the inner ring of an unsettled optimal cluster  $A$  contains at least  $(1 - 1/\alpha^2)$ -fraction points of cluster  $A$ . Conditioned on sampling a point from an unsettled optimal cluster  $A$  following distribution  $\widetilde{D}^2$  during the  $i^{th}$  iteration, the probability of sampling a point from the inner ring of  $A$  is  $\frac{\tilde{\Phi}(IR(A, \alpha), C_{i-1})}{\tilde{\Phi}(A, C_{i-1})}$ . To get a lower bound on this probability, we need a lower bound on  $\tilde{\Phi}(IR(A, \alpha), C_{i-1})$  and an upper bound on  $\tilde{\Phi}(A, C_{i-1})$ . We show the following.

**Lemma E.7.**  $\Pr(x \in IR(A, \alpha) \mid x \in A, A \in B_i) \geq (1 - 1/\alpha^2) \frac{(\sqrt{1+10\epsilon/9}-\alpha)^2}{180(1+\epsilon)}$ .

*Proof.* Conditioned on sampling a point from an unsettled optimal cluster  $A$ , the probability of sampling a point from the inner ring of that cluster during the  $i^{th}$  iteration is given as

$$\Pr(x \in IR(A, \alpha) \mid x \in A, A \in B_i) = \frac{\tilde{\Phi}(IR(A, \alpha), C_{i-1})}{\tilde{\Phi}(A, C_{i-1})}$$

Let  $c_{\mu_A}$  denote the center in  $C_{i-1}$  for which  $d_{km}^{est}(\mu_A, C_{i-1})$  is minimized. Let  $v = d_{km}^{est}(\mu_A, C_{i-1})$ . Recall that for any point  $x \in A$ ,  $c_x$  denotes the center in  $C_{i-1}$  for which  $d_{km}^{est}(x, C_{i-1})$  is minimized.

**Claim E.1.** *Let  $x$  and  $y$  be any two points for which  $d_{km}^{est}(x, C_{i-1})$  and  $d_{km}^{est}(y, C_{i-1})$  are minimized by centers  $c_x \in C_{i-1}$  and  $c_y \in C_{i-1}$ , respectively. Then, assuming event  $\mathcal{E}$  holds for all iterations of Algorithm 3, we have  $d_{km}^{est}(y, c_x) \leq d(x, y) + d_{km}^{est}(x, c_x) + 2r_{c_x}$  and  $d_{km}^{est}(x, c_y) \leq d(x, y) + d_{km}^{est}(y, c_y) + 2r_{c_y}$ .*

*Proof.* Let  $x$  be a point in the optimal cluster  $A$ . Since  $d_{km}^{est}(x, C_{i-1})$  is minimized by  $c_x \in C_{i-1}$ , for point  $x$ , the center  $c_x$  minimizes  $\min_{c \in C_{i-1}} (d_{km}^{est}(x, c) + r_c)$  and the ball  $B(c_x, r_{c_x})$  has at least  $180 \log n$  points in it. Conditioning on event  $\mathcal{E}$  for all iterations of Algorithm 3, we have for both  $d_{km}^{est}(x, c_x)$  and  $d_{km}^{est}(y, c_x)$ , the median distances are realized by points inside the ball  $B(c_x, r_{c_x})$ . Hence,  $d_{km}^{est}(y, c_x) \leq d(x, y) + d_{km}^{est}(x, c_x) + 2r_{c_x}$ . Similarly, the other inequality holds.  $\square$

Next, we obtain an upper bound on  $\tilde{\Phi}(A, C_{i-1})$ .

$$\begin{aligned} \tilde{\Phi}(A, C_{i-1}) &= \sum_{x \in A} d_{km}^{est}(x, C_{i-1})^2 \\ &= \sum_{x \in A} (d_{km}^{est}(x, c_x) + r_{c_x})^2 \\ &\leq \sum_{x \in A} (d_{km}^{est}(x, c_{\mu_A}) + r_{c_{\mu_A}})^2 \\ &\leq \sum_{x \in A} (d(x, \mu_A) + d_{km}^{est}(\mu_A, c_{\mu_A}) + 3r_{c_{\mu_A}})^2 \quad (\text{using Claim E.1}) \\ &\leq \sum_{x \in A} (d(x, \mu_A) + 3d_{km}^{est}(\mu_A, C_{i-1}))^2 \\ &\leq \sum_{x \in A} (2d(x, \mu_A)^2 + 18d_{km}^{est}(\mu_A, C_{i-1})^2) \\ &= \sum_{x \in A} (2d(x, \mu_A)^2 + 18v^2) \\ &= 2OPT(A) + 18|A|v^2 \\ &= 2|A|(r^2 + 9v^2) \end{aligned}$$

Now, we compute a lower bound on  $\tilde{\Phi}(IR(A, \alpha), C_{i-1})$ . Let  $b$  be any point in the inner ring  $IR(A, \alpha)$  of optimal cluster  $A$  and let  $c_b$  be the center in  $C_{i-1}$  for which  $d_{km}^{est}(b, C_{i-1})$  is minimized. We observe that  $d_{km}^{est}(\mu_A, C_{i-1}) \leq d_{km}^{est}(\mu_A, c_b) + r_{c_b}$ . Using Claim E.1,  $d_{km}^{est}(\mu_A, c_b) + r_{c_b} \leq d(\mu_A, b) + d_{km}^{est}(b, c_b) + 3r_{c_b} \leq d(\mu_A, b) + 3d_{km}^{est}(b, C_{i-1})$ . Hence,  $d_{km}^{est}(b, C_{i-1}) \geq (d_{km}^{est}(\mu_A, C_{i-1}) - d(\mu_A, b))/3 = (v - \alpha r)/3$ . We obtain the following.

$$\begin{aligned} \tilde{\Phi}(IR(A, \alpha), C_{i-1}) &= \sum_{b \in IR(A, \alpha)} d_{km}^{est}(b, C_{i-1})^2 \\ &\geq |IR(A, \alpha)| \frac{(v - \alpha r)^2}{9} \\ &\geq |A| \left(1 - \frac{1}{\alpha^2}\right) \frac{(v - \alpha r)^2}{9} \end{aligned}$$



Therefore, we have  $\Pr(x \in IR(A, \alpha) \mid x \in A, A \in B_i) \geq \frac{(1-1/\alpha^2)(v-\alpha r)^2}{18(r^2+9v^2)}$ . Since  $A$  is an unsettled optimal cluster with respect to  $C_{i-1}$ , we cannot have  $v = d_{km}^{est}(\mu_A, C_{i-1})$  to be very small. We obtain a lower bound on  $v$  as follows. Since  $A$  is an unsettled optimal cluster with respect to  $C_{i-1}$ , we have  $\tilde{\Phi}(A, C_{i-1}) > 20(1+\epsilon) \cdot OPT(A)$ .

$$\begin{aligned} 20(1+\epsilon) \cdot OPT(A) &< \tilde{\Phi}(A, C_{i-1}) \\ &\leq 2(OPT(A) + 9|A|v^2) \end{aligned}$$

Simplifying, we get

$$v > \sqrt{\frac{(18+20\epsilon) \cdot OPT(A)}{18|A|}} = \sqrt{(1+10\epsilon/9)} \cdot r$$

Substituting the above value for  $v$ , we get the probability of sampling a point from the inner ring of an unsettled optimal cluster  $A$ , conditioned on sampling a point from  $A$  is at least  $\Pr(x \in IR(A, \alpha) \mid x \in A, A \in B_i) \geq (1-1/\alpha^2) \frac{(\sqrt{1+10\epsilon/9}-\alpha)^2}{180(1+\epsilon)}$ .  $\square$

For  $\alpha = 1 + \epsilon/3$ , we have  $2(1+9\alpha^2) \leq 20(1+\epsilon)$ . For this choice of  $\alpha$ , following Lemma E.5, we obtain that the cost of an optimal cluster becomes at most  $20(1+\epsilon)$  times its optimal cost once  $180 \log n$  points are sampled from its inner ring. The probability of sampling a point from the inner ring of  $A$  becomes  $\Pr(x \in IR(A, \alpha) \mid x \in A, A \in B_i) \geq (1 - \frac{1}{(1+\epsilon/3)^2}) \frac{(\sqrt{1+10\epsilon/9} - (1+\epsilon/3))^2}{180(1+\epsilon)} \geq \frac{\epsilon^2}{800000} = g(\epsilon)$ , where  $g(\epsilon) = \frac{\epsilon^2}{800000}$ . We show that during iteration  $i$  of Algorithm 3, a point sampled following the  $\tilde{D}^2$  distribution will belong to the inner ring of an unsettled optimal cluster with probability at least  $g(\epsilon)/2$ . We bound the number of required samples such that the sampled set  $C$  contains at least  $180 \log n$  points from the inner rings of all unsettled optimal clusters with high probability.

**Lemma E.8.** *Let  $C \subset X$  denote a set of  $\frac{4320k \log n}{g(\epsilon)}$  points sampled using distribution  $\tilde{D}^2$  in Algorithm 3. Then, the total number of samples from the inner rings of unsettled optimal clusters in  $C$  is at least  $180k \log n$  with probability at least  $1 - \frac{1}{n^k}$ .*

*Proof.* Let  $C$  denote a set of  $\frac{4320k \log n}{g(\epsilon)}$  points sampled following distribution  $\tilde{D}^2$  in Algorithm 3. We will show that  $C$  contains at least  $180k \log n$  points from the inner rings of unsettled optimal clusters with high probability. Let  $s_i$  be a point sampled during iteration  $i$ . We define a random variable  $X_i$  as follows:

$$X_i = \begin{cases} 1 & \text{if } s_i \text{ belongs to the inner ring of an unsettled optimal cluster} \\ 0 & \text{otherwise} \end{cases}$$

Let  $l = \frac{4320k \log n}{g(\epsilon)}$ . Then,  $X = \sum_{i=1}^l X_i$  represents the total number of sampled points that belong to the inner rings of unsettled optimal clusters. From Lemma E.4 and Lemma E.7, the probability that a point sampled using distribution  $\tilde{D}^2$  belongs to the inner ring of an unsettled optimal cluster is:

$$\begin{aligned} \Pr[X_i = 1] &= \Pr[x \in IR(A, \alpha) : A \in B_i] \\ &= \Pr[x \in IR(A, \alpha) \mid x \in A, A \in B_i] \cdot \Pr[x \in A, A \in B_i] \\ &\geq \frac{1}{2} \cdot g(\epsilon) \end{aligned}$$

Therefore, we have  $\mathbb{E}[X_i] \geq \frac{1}{2} \cdot g(\epsilon)$ . The expected number of centers in  $C$  that belong to the inner rings of unsettled optimal clusters is  $\mathbb{E}[X] = \mathbb{E}[\sum_{i=1}^l X_i] = \sum_{i=1}^l \mathbb{E}[X_i] \geq l \cdot \frac{1}{2} \cdot g(\epsilon) = 2160k \log n$ . Using Chernoff bounds (Lemma A.1), the probability  $\Pr[X < 180k \log n] = \Pr[X < (1 - \frac{11}{12}) 2160k \log n] \leq e^{-2160k \log n \cdot \frac{121}{144} \cdot \frac{1}{2}} \leq \frac{1}{n^k}$ .  $\square$

**Lemma E.9.** *With probability at least  $(1 - 1/n^k)(1 - 1/n^2)$ , all optimal clusters become settled once a set  $C$  of  $\frac{4320k \log n}{g(\epsilon)}$  points are sampled following distribution  $\tilde{D}^2$  in Algorithm 3.*

*Proof.* Following Lemma E.8, with probability at least  $(1 - 1/n^k)$ , a set  $C$  of  $\frac{4320k \log n}{g(\epsilon)}$  points sampled following distribution  $\widetilde{D}^2$  contains at least  $180k \log n$  points from the inner rings of unsettled optimal clusters. Using Lemma E.5, we know that once  $180 \log n$  points are sampled from the inner ring of an unsettled optimal cluster  $A$ , with probability at least  $1 - 1/n^3$ , that cluster becomes settled. We condition on the event that unsettled optimal clusters become settled once  $180 \log n$  points are sampled from their inner rings, and using a union bound over  $k$  optimal clusters, this event happens for all  $k$  optimal clusters with probability at least  $(1 - 1/n^2)$ .

Note that as long as there is an unsettled optimal cluster, a sampled point in  $C$  will belong to the inner ring of some unsettled optimal cluster with probability at least  $g(\epsilon)/2$ , and crucially, this probability is independent of the number of unsettled optimal clusters. Once an unsettled optimal cluster becomes settled with  $180 \log n$  points sampled from its inner ring, it stops contributing to the probability of sampling a point from the inner rings of unsettled optimal clusters. Subsequently, points sampled in  $C$  with probability at least  $g(\epsilon)/2$  would account for the number of points sampled from the inner rings of the remaining unsettled optimal clusters.

Since a sampled set  $C$  of size  $\frac{4320k \log n}{g(\epsilon)}$  contains  $180k \log n$  points from the inner rings of unsettled optimal clusters with probability at least  $(1 - 1/n^k)$ , the probability that all optimal clusters become settled using sampled set  $C$  is at least  $(1 - 1/n^k)(1 - 1/n^2)$ .  $\square$

**Lemma E.10.** *Let  $C \subset X$  be a set of  $\frac{4320}{g(\epsilon)} \cdot k \log n$  sampled points. Then, we obtain  $\tilde{\Phi}(X, C) \leq 40(1 + \epsilon) \cdot \text{OPT}$  with probability at least  $(1 - 1/n^k)(1 - 1/n^2)(1 - 1/n)$ .*

*Proof.* Using Lemma E.8, we know that if we sample a center set  $C$  of size  $\frac{4320}{g(\epsilon)} k \log n$  following the  $\widetilde{D}^2$ -sampling distribution, the probability that  $C$  contains at least  $180k \log n$  points from the inner rings of the optimal clusters is at least  $1 - \frac{1}{n^k}$ . Following Lemma E.9, for a sampled set  $C$  of size at most  $\frac{4320}{g(\epsilon)} \cdot k \log n$ , all clusters become settled with probability at least  $(1 - 1/n^k)(1 - 1/n^2)$ . Using Lemma E.3, the probability that event  $\mathcal{E}$  holds for all iterations of Algorithm 3 is at least  $(1 - 1/n)$ . Hence, Algorithm 3 gives a  $40(1 + \epsilon)$ -approximation for  $k$ -means with probability at least  $(1 - 1/n^k)(1 - 1/n^2)(1 - 1/n)$ .

Query complexity: We initiate the algorithm with  $180 \log n$  centers, and at the end of the algorithm, we have in total  $180 \log n + \frac{4320 \cdot 800000}{\epsilon^2} \cdot k \log n = O(k \log n / \epsilon^2)$  centers. In every iteration, we sample a center, and for that center, we query the weak oracle  $\widetilde{WO}$  for every  $x \in X$  to get the distances. Hence, we make  $n$  weak-oracle queries in each iteration. Since there are  $O(k \log n / \epsilon^2)$  iterations, in total, we make  $O(nk \log n / \epsilon^2)$  queries to the weak-oracle. To compute  $d_{km}^{est}(x, C_i)$  for all  $i$  in Algorithm 3, we need to perform strong-oracle queries. We make these strong-oracle queries to find the distances between any two centers in  $C_i$ . Hence, the number of strong-oracle queries required by Algorithm 3 is at most  $O(\frac{k^2 \log^2 n}{\epsilon^4})$ .

With probability at least  $(1 - 1/n^2)$ , we sample at most  $180 \log n$  points from the inner ring of any unsettled optimal cluster  $A$ . We require the number of points in the inner ring,  $(1 - 1/\alpha^2)|A|$ , to be at least  $180 \log n$ . This gives a lower bound on the size of each optimal cluster  $A$  of  $\frac{480 \log n}{\epsilon}$ , for  $\alpha = 1 + \epsilon/3$ .  $\square$

## E.2 Removing lower bound assumption on cluster sizes

In Section E, we showed that conditioned on each optimal cluster having at least  $\frac{480 \log n}{\epsilon}$  points, there exists an algorithm for  $k$ -means clustering that gives a  $40(1 + \epsilon)$ -approximation with high probability. In this section, we describe how to adapt the algorithm when there are optimal clusters with fewer than  $\frac{480 \log n}{\epsilon}$  points. These are the optimal clusters  $A$  for which the inner ring  $IR(A, \alpha)$  contains fewer than  $180 \log n$  points in it. We know that following Lemma E.7 and Lemma E.8, points from the inner ring of an unsettled optimal cluster are sampled with probability at least  $g(\epsilon)/2$  and once we sample  $\frac{4320}{g(\epsilon)} \cdot k \log n$  points, we sample  $180 \log n$  points from the inner rings of all optimal clusters. Now, if there are less than  $180 \log n$  points in the inner ring of some optimal clusters, it implies that we sample all points of those inner rings. However, since the number of points sampled from the

inner ring is less than  $180 \log n$ , we cannot apply Lemma E.5 to claim that the unsettled optimal cluster  $A$  would become settled.

We modify our algorithm as follows. Since there might exist small clusters with less than  $\frac{480 \log n}{\epsilon}$  points, we increase the total number of points to be sampled to ensure that  $\frac{480 \log n}{\epsilon}$  points will be sampled from any unsettled optimal cluster. The set  $C$  of samples will have size  $O(\frac{k \log n}{\epsilon g(\epsilon)})$ . For optimal clusters with more than  $180 \log n$  points in their inner ring, as before, the Algorithm 3 will sample  $180 \log n$  points from their inner rings and those clusters will become settled with high probability. For optimal clusters with fewer than  $180 \log n$  points in their inner rings, either all points of those clusters will be sampled or the cluster will become settled. Substituting  $g(\epsilon) = O(\epsilon^2)$ , we get the sample complexity of this modified algorithm to be  $O(\frac{k \log n}{\epsilon^3})$ , and for the same approximation guarantee of  $40(1 + \epsilon)$ -approximation, the number of strong-oracle and weak-oracle queries will be  $O(\frac{k^2 \log^2 n}{\epsilon^6})$  and  $O(nk \log n / \epsilon^3)$ , respectively.

**Theorem E.2.** *Let  $\epsilon \in (0, 1)$  and  $\delta \leq 1/3$ . There exists a randomized algorithm for  $k$ -means that makes  $O(\frac{k^2 \log^2 n}{\epsilon^6})$  strong-oracle queries and  $O(\frac{nk \log n}{\epsilon^3})$  weak-oracle queries to yield a  $(O(\frac{\log n}{\epsilon^3}), 40(1 + \epsilon))$  bi-criteria approximation for  $k$ -means, and succeeds with at least some constant probability.*

### E.3 Constant approximation for $k$ -means in weak-strong oracle model

**Theorem E.3.** *There exists a randomized algorithm for  $k$ -means in the weak-strong oracle model that computes a constant factor approximation with constant probability using  $O(\frac{k^2 \log^2 n}{\epsilon^6})$  strong-oracle queries and  $O(\frac{nk \log n}{\epsilon^3})$  weak-oracle queries.*

*Proof.* We use the algorithm of Theorem E.2 to obtain a bi-criteria approximation guarantee for  $k$ -means. Let  $C_{t+1}$  denote the resulting set of centers. Each center  $c_i \in C_{t+1}$  is initialized with weight  $w(c_i) = 0$ . Next, we assign every point  $x$  to the center in  $C_{t+1}$  for which  $d_{km}^{est}(x, C_{t+1})$  is minimized. This create a weighted  $k$ -means instance with  $O(\frac{k \log n}{\epsilon^3})$  points where each center  $c_i$  in  $C_{t+1}$  is assigned  $w(c_i)$  points. Since we have used strong-oracle queries for all pairs of points in this weighted instance, we know the exact distances between all pairs of points. We run a constant factor approximation algorithm, such as the algorithm by [21] on this weighted  $k$ -means instance to obtain a constant factor approximation for  $k$ -means. The constant factor approximation guarantee for  $k$ -means follows using Proposition 20 of [6].  $\square$

## F Lower bound in the weak-oracle model

In this section we show that any randomized algorithm giving a constant factor approximation for the  $k$ -means problem in the weak-oracle model requires to make expected  $\Omega(\frac{nk}{(1-2\delta)^2})$  queries. For simplicity of calculations, we show this result for the  $k$ -median problem. Similar results follow for the  $k$ -means problem as well.

**Theorem F.1.** *Let  $\delta \in (0, 1/2)$ . Any randomized algorithm in the weak-oracle model giving any constant factor approximation for the  $k$ -median problem with probability at least  $3/4$  must make  $\Omega(\frac{nk}{(1-2\delta)^2})$  of queries in expectation to the weak-oracle.*

*Proof.* To prove the lower bound, we construct a hard instance for which any randomized algorithm giving any constant factor approximation for  $k$ -median with high probability requires to make a lot of weak-oracle queries. Consider an instance  $X$  with  $n$  points. These  $n$  points are partitioned into  $k$  groups, each containing  $\frac{n}{k}$  points. We denote these partitions as  $C_1, C_2, \dots, C_k$ . We define distances between points in  $X$  as follows: for any two points  $x, y$  belonging to the same partition  $C_i$ , we set  $d(x, y) = 1$ , and for points  $x \in C_i$  and  $y \in C_j$ , where  $i \neq j$ , we set  $d(x, y) = l$ , where  $l$  is a large number. These distances satisfy the metric property. For this instance, the optimal  $k$ -median solution has cost  $n - k$ .

Recall that an algorithm for  $k$ -median in the weak-oracle model gets access to distance values only through the weak-oracle. Suppose that all points in  $X$  have been clustered correctly except for one

point,  $v$ . We need to assign  $v$  to its correct cluster, say  $C_v$ . If  $v$  gets assigned to an incorrect cluster, then the cost for  $v$  would be  $l$ . Hence, the  $k$ -median clustering cost would be at least  $(n - k - 1) + l$ . For  $l = c \cdot (n - k)$  for some constant  $c > 0$ , the  $k$ -median cost of a clustering that misclassifies even a single point is at least some constant times the value of the optimal solution. Therefore, the algorithm needs to correctly classify all input points to achieve a constant factor approximation for  $k$ -median.

Let  $\bar{d}(x, y)$  denote the value returned by the weak-oracle for any two input points  $x, y$ . Then, the following holds.

$$\bar{d}(x, y) = \begin{cases} 1 & \text{with probability } 1 - \delta \text{ if } x, y \text{ belong to the same cluster} \\ l & \text{with probability } \delta \text{ if } x, y \text{ belong to the same cluster} \\ l & \text{with probability } 1 - \delta \text{ if } x, y \text{ belong to different clusters} \\ 1 & \text{with probability } \delta \text{ if } x, y \text{ belong to different clusters} \end{cases}$$

For our query lower bound in the weak-oracle model, we use a lower bound result for the Query-Cluster problem studied by [20]. The authors consider a setup where there is an unknown ground truth  $k$ -clustering of a set  $X$  of  $n$  points, and the algorithmic task is to recover the ground truth clustering using queries to an oracle that answers whether any two points belong to the same cluster or not. Moreover, the query answers are wrong independently with probability  $\delta < 1/2$ . The authors prove a  $\Omega(\frac{nk}{(1-2\delta)^2})$  lower bound on the number of oracle queries for this Query-Cluster problem that recovers the ground truth  $k$ -clustering.

Our weak-oracle query lower bound of  $\Omega(\frac{nk}{(1-2\delta)^2})$  follows by observing that one can reduce the Query-Cluster problem to the cluster recovery problem on an instance generated as above by the weak-oracle. Hence, the weak-oracle query lower bound  $\Omega(\frac{nk}{(1-2\delta)^2})$  holds for any algorithm giving any constant factor approximation of  $k$ -median in weak-oracle model.  $\square$

## G Algorithm for $k$ -center in weak-strong oracle model

We start by exploring whether known algorithms for the  $k$ -center problem can be implemented in the weak-strong oracle model. One key challenge is the *assignment* of points to centers. This means that even if we can locate  $k$  good centers, we also need to output a mapping of points to the nearest center. This implies that we need to be able to calculate the distances of every point to a set of centers. Since we can use only a sublinear number of strong-oracle queries, we do not have accurate distances for doing this mapping. The lack of accurate distances also comes in the way of finding good centers since mapping and finding good centers go hand-in-hand in  $k$ -center algorithms. So, the important question is: *Can we get a reasonably accurate estimate of distances using weak-oracle queries?* We faced similar issues while designing an algorithm for the  $k$ -means problem as well. We will show that the distance function as defined in Definition E.1 will help in designing an algorithm for the  $k$ -center problem as well.

We will design a randomised algorithm within the weak-strong model that gives a  $(6 + \varepsilon)$ -approximation for the  $k$ -center problem. The main idea of the algorithm can be better understood in a simpler setting where the accurate distances are known. Let us see the outline of this algorithm. We shall assume that the optimal  $k$ -center radius  $r_{opt}$  is known.<sup>2</sup> The algorithm is a simple “*greedy ball-carving*” procedure that is commonly used in the context of the  $k$ -center problem and can be stated as the following pseudocode (also stated as Algorithm 3 in [6]):

---

<sup>2</sup>This is not an unreasonable assumption to make since we can guess the optimal radius with  $(1 \pm \varepsilon)$  by iterating over discrete choices of the radius.

---

**Algorithm 4: Greedy Ball Carving**

---

**Input** : Set of points  $S$ , radius  $Rad$

**Output** : A set of  $C = \{c_1, \dots, c_m\}$  centers and assignment of points in  $S$  to centers in  $C$

▷ Initialize:  $C = \{\}$

**while**  $S$  is not empty **do**

    ▷ Pick an arbitrary point  $c \in S$

    ▷ Treat  $c$  as a center and assign any point  $s \in S$  to  $c$  if  $d(c, s) \leq 2Rad$ .

    ▷ Add  $c$  to  $C$  and remove all points assigned to  $c$  from  $S$ .

**end**

---

We execute the above algorithm with inputs  $S = X$  and  $Rad = r_{opt}$ . We can argue that the greedy ball carving algorithm terminates after picking at most  $k$  centers and assigning all points in  $X$ . This means that the algorithm gives a 2-factor approximation guarantee.

**Lemma G.1.** *Let  $(X, k)$  be any instance of the  $k$ -center problem and let  $r_{opt}$  denote the optimal  $k$ -center radius for  $X$ . The greedy ball carving procedure, when executed with inputs  $S = X$ ;  $Rad = r_{opt}$ , gives a 2-approximate solution for the instance  $(X, k)$ .*

*Proof.* Let  $\{c_1^*, \dots, c_k^*\}$  be the optimal  $k$  centers and let  $X_1^*, \dots, X_k^*$  be the corresponding  $k$  clusters of dataset  $X$ . So, for every  $i$ ,  $X_i^* \subset \mathcal{B}(c_i^*, r_{opt})$ . If the  $k$  centers chosen by the greedy ball carving algorithm belong to  $k$  distinct optimal clusters  $X_1^*, \dots, X_k^*$  and we assign points by carving out balls of radius  $2r_{opt}$  around every chosen center, then all points are guaranteed to get assigned to a center within a distance  $2r_{opt}$ , giving a 2-factor approximation. So, all we need to show is that the algorithm chooses centers from all of the distinct optimal clusters. We can show this by induction on the iteration number. The statement trivially holds for the first iteration. Suppose the algorithm chooses centers from distinct clusters  $j_1, \dots, j_i$  in the first  $i$  iterations. Note that in the next iterations, the algorithm picks centers from the set of points that does not contain any of the points in  $X_{j_1}^*, \dots, X_{j_i}^*$  as they have been carved out when removing points within balls of radius  $2r_{opt}$  around the chosen centers. So, the  $(i + 1)^{th}$  center will be chosen from a new optimal cluster. So, the ball carving algorithm terminates after picking  $k$  centers from  $k$  distinct optimal clusters. This completes the proof of the lemma.  $\square$

The reason we discussed the greedy ball carving algorithm and its analysis is that our  $6(1 + \varepsilon)$ -factor approximation follows the same template. The only complication is that during the ball carving step, where we remove all points within the radius  $2r_{opt}$ , we need accurate distances, which we do not have in the weak-strong oracle model. So, we need to do more than choose a center, and carve out a ball of radius  $2r_{opt}$  in every step. Let us continue assuming that the optimal radius  $r_{opt}$  is known. We will give a 6-factor approximation under this assumption, which changes to  $6(1 + \varepsilon)$  when the assumption is dropped. To enable distance estimates, along with a center  $c_i$ , we must also pick a set of nearby points to  $c_i$ , which will help in estimating the distance of any point  $y$  to  $c_i$  following Lemma E.1. A reasonable way to do this would be to uniformly sample a set  $T_i$  of points (instead of one), use the strong-oracle queries on the subset and pick a center  $c_i \in T_i$  with the largest number of points in  $T_i$  within a radius  $2r_{opt}$ . Let  $S_{c_i}$  denote the subset of points in  $T_i$  within a distance of  $2r_{opt}$  to  $c_i$ . We can now obtain distance estimates using the tuple  $(c_i, S_{c_i})$  using the weak-oracle queries as in Lemma E.1 and carve out those points and assign them to  $c_i$  that satisfy  $d_{km}^{est}(c_i, z) \leq r$  for an appropriate value of  $r$ . Let  $c_i$  belong to the optimal cluster  $X_i^*$ . What should the appropriate value of  $r$  be such that the points in  $S \cap X_i^*$  are guaranteed to get carved out and assigned to  $c_i$ ? Since the distance estimates are inaccurate, we must use  $r = 4r_{opt}$ . However, this may cause a point that is  $6r_{opt}$  away from  $c_i$  to get carved out and assigned to  $c_i$ . This is the reason we obtain an approximation guarantee of 6. This high-level analysis lacks two relevant details: (i) how do we eliminate the assumption that  $r_{opt}$  is known, and (ii) probability analysis for all points being assigned a center within distance  $6r_{opt}$ . We remove the assumption about  $r_{opt}$  being known by iterating over discrete choices for the optimal radius  $Rad = (1 + \varepsilon)^0, (1 + \varepsilon), (1 + \varepsilon)^2, \dots$ . We will argue that the ball carving succeeds for the choice  $Rad = r_{opt}(1 + \varepsilon)$  with high probability. So, the approximation guarantee we get is  $6(1 + \varepsilon)$ . Instead of iterating over the possible choices of  $Rad$  linearly, we can do that using binary search, which results in the running time and query complexity getting multiplied by a factor of  $O\left(\log \frac{\log \Delta}{\varepsilon}\right)$  due to this repeated ball carving (once for every choice of  $Rad$ ), where  $\Delta$  is the aspect ratio. Assuming  $\Delta$  to be polynomially bounded (which is a popular assumption), the

multiplicative factor becomes  $O\left(\log \frac{\log n}{\varepsilon}\right)$ . In the remaining discussion, we state our algorithm more precisely and do the probabilistic analysis.

---

**Algorithm 5:** Weak-Greedy Ball Carving

---

**Input :** Set of points  $S$ , radius  $Rad$

**Output :** A set of  $C = \{c_1, \dots, c_m\}$  centers and assignment of points in  $S$  to centers in  $C$

▷ Initialize:  $C = \{\}$

**while**  $S$  is not empty **do**

- (1) If  $(|C| = k)$  **abort**
- (2) If  $(|S| \leq 180k \log n)$ , use strong-oracle queries to find the remaining centers covering all points in  $S$  within distance  $2Rad$ . If this is not possible, **abort**. Otherwise, output the  $k$  centers picked.
- (3) Pick a subset  $T \subset S$  of size  $180k \log(n)$  uniformly at random
- (4) Query the strong-oracle to find distances between elements in  $T$  and use these to find a center  $c \in T$  such that  $|S_c|$  is maximised, where  $S_c \equiv |\mathcal{B}(c, 2Rad) \cap T|$ .
- (5) If  $(|S_c| < 180 \log n)$  **abort**
- (6) Retain  $180 \log n$  points in  $S_c$  (i.e., remove the extra point)
- (7) Treat  $c$  as a center and assign any point  $s \in S$  to  $c$  if  $d_{km}^{est}(s, c) \leq 4Rad$ .
- (8) Add  $c$  to  $C$  and remove all points assigned to  $c$  from  $S$ .

**end**

**return**  $C$  and the assignment

---

We prove the following lemma related to Algorithm 5.

**Lemma G.2.** *Let  $(X, k)$  be any instance of the  $k$ -center problem and let  $r_{opt}$  denote the optimal  $k$ -center radius for  $X$ . Then, Algorithm 5 satisfies the following two properties:*

1. *For any value of  $Rad$ , given that the algorithm does not abort, the probability that all points are within  $6Rad$  of the centers chosen is at least  $(1 - 1/n^4)$ .*
2. *For any  $Rad \geq (1 + \varepsilon)r_{opt}$ , the probability that the algorithm does not abort is at least  $(1 - 1/n^4)$ .*

*Proof.* For the second property, we will use the same induction-based argument as in the proof of Lemma G.1. Given that in the first  $i - 1$  iterations, the centers  $c_1, \dots, c_{i-1}$  belong to  $i - 1$  distinct optimal clusters  $X_{j_1}^*, \dots, X_{j_{i-1}}^*$  and  $S$  does not contain any points from these clusters, we will show that the probability that the next chosen center  $c_i$  belonging to a new cluster  $X_{j_i}^*$  carves out any point  $z \in S \cap X_{j_i}^*$  is at least  $(1 - 1/n^5)$ . Note that by our choice of center  $c_i$  and the fact that  $Rad \geq (1 + \varepsilon)r_{opt}$ , we have  $|S_{c_i}| \geq 180 \log n$ . Consider any point  $z \in X_{j_i}^* \cap S$ . We have  $d(z, c_i) \leq 2Rad$  and from Lemma E.1,  $\Pr[|d_{km}^{est}(z, c_i) - d(z, c_i)| \leq 2Rad] \geq 1 - \frac{1}{n^5}$ . From this we get  $\Pr[d_{km}^{est}(z, c_i) \leq 4Rad] \geq 1 - \frac{1}{n^5}$ . So, with probability at least  $(1 - \frac{1}{n^5})$ ,  $z$  gets assigned to the center  $c_i$ . So, the probability that there is a point in  $X_{j_i}^* \cap S$  that does not get assigned to  $c_i$  is at most  $\frac{1}{n^5}$ . So, by union bound, the probability of a point in  $X$  that does not get assigned to centers  $c_1, \dots, c_k$  is at most  $\frac{1}{n^4}$ .

For the first property, let us bound the probability that a point  $z$  gets assigned a center that is at a distance  $> 6Rad$ . Suppose the  $z$  is assigned a center in iteration  $i$ . So, it gets assigned center  $c_i$ . This means that  $d_{km}^{est}(z, c_i) \leq 4Rad$ . The probability that  $d(z, c_i) > 6Rad$  is at most  $\frac{1}{n^4}$  from the previous discussion. So, the probability that there is a point that gets assigned a center which is  $> 6Rad$  distance away is at most  $\frac{1}{n^4}$  from the union bound. So, property (1) follows.  $\square$

Let us see why calling Algorithm 5 with input  $(X, Rad)$  while doing a binary search over  $Rad$  gives a  $6(1 + \varepsilon)$ -approximate solution with high probability. From Lemma G.2, if  $Rad < (1 + \varepsilon)r_{opt}$ , and the algorithm does not abort, then with probability at least  $(1 - 1/n^4)$  all points are assigned a center that is within distance  $6Rad < 6(1 + \varepsilon)r_{opt}$ . On the other hand, if  $Rad \geq (1 + \varepsilon)r_{opt}$ , then the algorithm does not abort with probability at least  $(1 - 1/n^4)$ . So, the binary search will terminate with a  $6(1 + \varepsilon)$ -approximate solution with high probability.

*Query complexity:* The number of strong-oracle queries in every iteration of the weak greedy ball carving algorithm is  $O(k^2 \log^2 n)$ . So, the total number of strong queries across  $k$  iterations is  $O(k^3 \log^2 n)$ . The number of weak Oracle queries is  $O(nk \log n)$ . Taking into account the binary search over  $Rad$ , the number of strong-oracle and weak-oracle queries are  $O\left(k^3 \log^2 n \log \frac{\log n}{\epsilon}\right)$  and  $O\left(nk \log n \log \frac{\log n}{\epsilon}\right)$ , respectively.

**Theorem G.1.** *There exists a  $6(1 + \epsilon)$ -approximation algorithm for the  $k$ -center problem that makes  $O\left(k^3 \log^2 n \log \frac{\log n}{\epsilon}\right)$  strong-oracle and  $O\left(nk \log n \log \frac{\log n}{\epsilon}\right)$  weak-oracle queries and succeeds with probability at least  $(1 - 1/n^4)^2$ .*

## H Experimental Results

We run our algorithms for  $k$ -means and  $k$ -center problems on synthetic as well as real-world datasets to demonstrate that our algorithms can be implemented efficiently in practice, and in particular, our algorithms outperform the algorithms of Bateni *et al.* [6]. In our experiments, we vary the failure probability  $\delta$  of the weak-oracle and run our algorithms on datasets of different sizes, and report how the cost of clustering varies with the number of oracle queries.

**Remark H.1.** *In our discussions of strong-oracle queries so far, we interpret a strong-oracle query as a query for the distance between two points. We note that Bateni *et al.* [6], in their experiment results, report the number of point queries, where an oracle on a point query provides the embedding of the point. Consider the following example for more clarity about the relation between the number of point queries and the number of strong-oracle queries. Let us have a set  $S$  of points, and let us make a point query for each of the  $|S|$  points. This will give us the embedding of all points in the set  $S$ , and using these embeddings, we can compute the pairwise distances between all pairs of points in  $S$ . On the other hand, to find the pairwise distances between all pairs of points in  $S$ , one must make  $\binom{|S|}{2}$  strong-oracle queries.*

For ease of comparison of our results with Bateni *et al.* [6], we report the percentage of point queries used by our algorithms in our experimental results.

**Experimental setup** The initial experiments were carried out on a Mac Mini with an M2 chip and 8GB RAM. Subsequently, the computationally intensive experiments were performed on a server having 1.5 TB RAM with 64 CPU cores. It took about 10 days to obtain the experimental results.

**Datasets** We run our algorithms on synthetic as well as real-world datasets, and compare the performance of our algorithms with those of Bateni *et al.* [6]. The datasets used in our experiments are described as follows. We generate synthetic data using the Stochastic Block Model (SBM) ([24, 1]). We use three synthetic datasets in our experiments with the number of points  $n$  being  $10k$ ,  $20k$  and  $50k$ , respectively. Each of these datasets has  $k = 7$  clusters, and the points in the datasets belong to a seven-dimensional space. The points in the  $i$ th cluster of the datasets are drawn from a Gaussian distribution  $N(\mu^{(i)}, I)$ , where  $\mu^{(i)}[i] = 10^5$  and  $\mu^{(i)}[j] = 0$  for  $j \neq i$ . This ensures that the points within the same cluster are close to each other, while the optimal clusters remain well separated.

For the real-world data, we use the MNIST dataset ([10, 25]). The MNIST dataset has ten clusters,  $k = 10$ . The dataset has  $n = 60k$  images, each with a dimension of  $28 \times 28$ . Similar to Bateni *et al.* [6], we apply SVD and t-SNE embeddings to embed the dataset into  $d = 50$  dimensions and  $d = 2$  dimensions, respectively.

**Construction of the weak-oracle** In order to construct the weak-oracle, we first create a perturbed distance matrix for both datasets as follows. This matrix is initialized with the actual distances between the points in the dataset. For the SBM-based synthetic dataset, for any two points  $i$  and  $j$ , if they belong to the same cluster, independently with probability  $\delta$ , the  $(i, j)$ th entry of the perturbed matrix is set to  $10^5$ . And if  $i$  and  $j$  belong to different clusters, independently with probability  $\delta$ , the  $(i, j)$ th entry of the matrix is set to one. This is how we create the perturbed matrix using which the weak-oracle responds to a query for the SBM-based synthetic dataset.

For the MNIST dataset, if two points belong to the same cluster (i.e., the same digit class), we replace the distance between the points in the matrix with a randomly chosen inter-cluster distance between two points in different clusters. If the points belong to different clusters (i.e., different digit classes), we assign them a randomly chosen intra-cluster distance. Bateni *et al.* [6] notes that the SBM and MNIST datasets embedded using t-SNE with  $d = 2$  and SVD with  $d = 50$ , have clear ground-truth clusterings. Since we know the ground-truth clustering for these embeddings, we can construct the weak-oracle in the manner described above.

**Baselines in our experiments** We run the  $k$ -means++ algorithm on these datasets using the strong oracle, and use its output as the *strong baseline* in our experiments for  $k$ -means. Similarly, we run the  $k$ -means++ algorithm on these datasets using the weak oracle, and use its output as the *weak baseline*. In our experimental results, we compute the approximation factor of our algorithm by calculating the ratio of the cost of our algorithm with this strong baseline.

We compare the performance of our algorithms for  $k$ -center with the baselines computed as follows. The output of the farthest point algorithm of Gonzalez [15] gives us the baseline for both the SBM-based synthetic dataset as well as the MNIST dataset. The strong and weak baselines for the experiments on  $k$ -center are obtained by running the algorithm of [15] with the strong-oracle and weak-oracle, respectively. In the experiments, we report the approximation factors obtained by our algorithms as the ratio of the cost of our algorithm with the strong baseline.

**Experimental results on  $k$ -means clustering** In our experiments, we run our  $k$ -means algorithm on SBM-based synthetic datasets of size  $n = 10k, 20k$  and  $50k$ , and set the failure probability  $\delta$  of the weak-oracle to be 0.1, 0.2 and 0.3. For each of the above choices, we run our algorithm with the number of point queries, decided as follows. Using our theoretical results,  $O(\frac{k \log n}{(1/2-\delta)^2})$  point queries suffice to get a constant approximation. In the experiments, we vary the constant factor in the expression  $O(\frac{k \log n}{(1/2-\delta)^2})$  from 0.01 to 3 and observe the resulting clustering cost.

| MNIST | % of point queries |                |                | Approximation factor |                |                |
|-------|--------------------|----------------|----------------|----------------------|----------------|----------------|
|       | $\delta = 0.1$     | $\delta = 0.2$ | $\delta = 0.3$ | $\delta = 0.1$       | $\delta = 0.2$ | $\delta = 0.3$ |
| SVD   | 0.116              | 0.141          | 0.158          | 1.019                | 1.03           | 1.008          |
| t-SNE | 0.233              | 0.283          | 0.3            | 1.1595               | 1.1433         | 1.0906         |

Table 3: Performance of our  $k$ -means algorithm on MNIST dataset

| $n$   | % of point queries |                |                | Approximation factor |                |                |
|-------|--------------------|----------------|----------------|----------------------|----------------|----------------|
|       | $\delta = 0.1$     | $\delta = 0.2$ | $\delta = 0.3$ | $\delta = 0.1$       | $\delta = 0.2$ | $\delta = 0.3$ |
| $10k$ | 0.77               | 0.79           | 0.79           | 2.156                | 0.9664         | 0.998          |
| $20k$ | 0.45               | 0.47           | 0.495          | 1.065                | 1.089          | 1.0695         |
| $50k$ | 0.2                | 0.21           | 0.214          | 1.043                | 1.058          | 1.015          |

Table 4: Performance of our  $k$ -means algorithm on SBM-based synthetic data

Tables 3 and 4 show our experimental results for  $k$ -means clustering on the MNIST dataset with SVD and t-SNE embeddings, and on SBM-based datasets of sizes  $n = 10k, 20k$ , and  $50k$ . We conducted experiments for different combinations of failure probability  $\delta$  and the number of point queries. In Table 4, we mention the results for the setting for which the value of (number of point queries  $\times$  log(cost of clustering)) is minimized.

**Comparison of performance of our  $k$ -means algorithm with Bateni *et al.* [6]:** We compare the performance of our  $k$ -means algorithm with the  $k$ -means algorithm of [6] as follows. Figures 3 and 4 capture how the clustering cost varies with the number of point queries when these algorithms are run on SBM-based synthetic datasets of size  $10k$  and  $20k$ , respectively. The blue, green, and red lines in the plots represent results for  $\delta = 0.1$ ,  $\delta = 0.2$ , and  $\delta = 0.3$ , respectively. The solid lines show how the clustering cost behaves as the number of point queries is changed in our algorithm. The dotted lines represent the results from [6]. Note that since we don't have their exact data, we reported these values by visually interpreting their plots.



We observe in the experiments that as the number of point queries increases, the clustering cost given by our algorithm as well as the algorithm in [6] decreases. Take any value of  $\delta$ , say  $\delta = 0.1$ . The cost versus the number of point queries behavior of our algorithm is represented by the solid blue line, while the performance of the algorithm of [6] is shown using the dotted blue line in Figures 3 and 4. We observe that in both Figures 3 and 4, our algorithm achieves a lower cost with significantly fewer point queries. Similar observations hold for other values of  $\delta$ . Our algorithm makes at least 73% fewer point queries compared to [6] for every choice of  $\delta \in \{0.1, 0.2, 0.3\}$  and  $n \in \{10k, 20k, 50k\}$ .

We note that the costs of  $k$ -means solutions of [6], given enough point queries, as shown in Figures 3 and 4, tend to be smaller than the cost achieved by our  $k$ -means algorithm. It seems that the strong baseline used by [6] achieves a lower cost compared to the strong baseline used by our algorithm. Note that we use  $k$ -means++ with strong-oracle queries to compute the strong baseline for  $k$ -means.

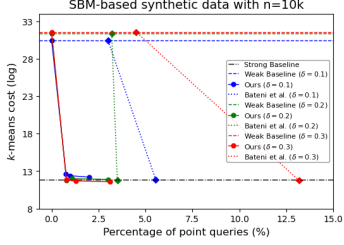

Figure 3:  $k$ -means on SBM dataset with  $n = 10k$

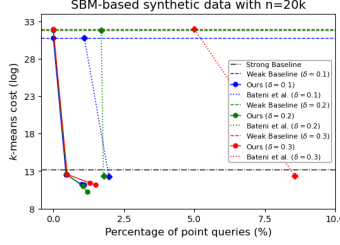

Figure 4:  $k$ -means on SBM dataset with  $n = 20k$

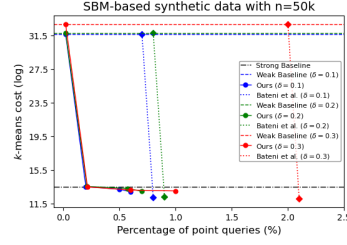

Figure 5:  $k$ -means on SBM dataset with  $n = 50k$

Figures 6 and 7 show how our  $k$ -means clustering cost changes with respect to the number of strong queries on the MNIST dataset using SVD and t-SNE embeddings. Unlike SBM-based datasets, the distances between clusters in the MNIST are relatively smaller. Because of this, there is little difference between the weak and strong baselines in these figures. Recall that to construct the weak oracle, if two points belong to the same cluster, we replace their distance with the distance between two points from different clusters. Since the inter-cluster distances in MNIST (with both SVD and t-SNE embeddings) are small, the weak and strong baselines end up being quite similar.

We believe that the  $k$ -means++ cost on the MNIST dataset using t-SNE embeddings is higher than the cost using SVD embeddings. However, based on the visualizations of  $k$ -means results on MNIST provided in [6], the baseline cost for t-SNE appears to be lower than that for SVD. Therefore, we could not directly use the results from [6] for comparison with our own.

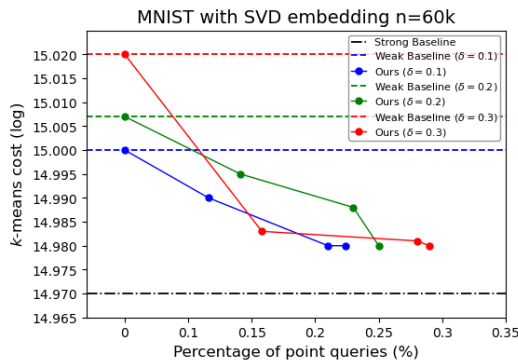

Figure 6:  $k$ -means on MNIST with SVD embedding,  $n = 60k$

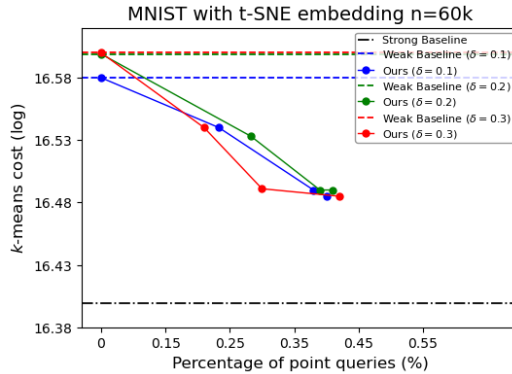

Figure 7:  $k$ -means on MNIST with t-SNE embedding,  $n = 60k$

**Experimental results on  $k$ -center clustering** We run our  $k$ -center algorithm on SBM-based synthetic datasets of size  $n = 10k, 20k$  and  $50k$  as well as the MNIST dataset with SVD and t-SNE embeddings, and vary the failure probability  $\delta$  of the weak-oracle as 0.1, 0.2 and 0.3. For each of the above choices, we run our  $k$ -center algorithm on the dataset with varied number of point queries.

The number of point queries used in the experiments is decided as follows. Using our theoretical results,  $\tilde{O}(\frac{k^2 \log n}{(1/2-\delta)^2})$  point queries suffice to get a constant approximation. In the experiments, we set the number of points queries to be  $O(\frac{k \log n}{(1/2-\delta)^2})$  and vary the constant factor in the above expression from 0.01 to 3.6 and observe the cost of clustering mentioned below.

| $n$ | % of point queries |                |                | Approximation factor |                |                |
|-----|--------------------|----------------|----------------|----------------------|----------------|----------------|
|     | $\delta = 0.1$     | $\delta = 0.2$ | $\delta = 0.3$ | $\delta = 0.1$       | $\delta = 0.2$ | $\delta = 0.3$ |
| 10k | 2                  | 2.5            | 3.86           | 0.84                 | 0.9            | 0.86           |
| 20k | 1.1                | 1.4            | 2.1            | 0.78                 | 0.84           | 0.79           |
| 50k | 0.44               | 0.6            | 0.9            | 0.81                 | 0.8            | 0.77           |

Table 5: Performance of our  $k$ -center algorithm on SBM-based synthetic data

| MNIST | % of point queries |                |                | Approximation factor |                |                |
|-------|--------------------|----------------|----------------|----------------------|----------------|----------------|
|       | $\delta = 0.1$     | $\delta = 0.2$ | $\delta = 0.3$ | $\delta = 0.1$       | $\delta = 0.2$ | $\delta = 0.3$ |
| t-SNE | 0.25               | 0.29           | 0.30           | 1.276                | 1.3            | 1.35           |
| SVD   | 0.25               | 0.25           | 0.25           | 2.46                 | 2.45           | 2.31           |

Table 6: Performance of our  $k$ -center algorithm on MNIST dataset

Tables 5 and 6 show our experimental results on  $k$ -center clustering on SBM-based synthetic datasets of size  $n = 10k, 20k$  and  $50k$  and on MNIST dataset with SVD and  $t$ -SNE embeddings. We conducted experiments for different combinations of  $\delta$  and the number of point queries. In Table 5 and Table 6, we report the results for which the value of (number of point queries  $\times$  log(cost of clustering)) is minimized.

**Comparison of performance of our  $k$ -center algorithm with Bateni *et al.* [6]:** We compare the performance of our  $k$  center algorithm with the  $k$ -center algorithm of [6]. Figures 8, 9, and 10 illustrate how the clustering cost changes as the number of point queries increases. These results are based on SBM-based synthetic datasets of size  $10k, 20k$ , and  $50k$ , respectively. In the plots, the blue, green, and red lines represent the results for  $\delta = 0.1, \delta = 0.2$ , and  $\delta = 0.3$ . Solid lines show the performance of our algorithm, while dotted lines indicate the results from [6]. Since we do not have access to their exact data, we estimated their values by visually interpreting their plots. We observe significant reduction in the number of point queries by our algorithm compared to [6]. Our results show that our algorithms use at least 47%, 12% and 44% fewer point queries compared to [6] for  $n = 10k, 20k$  and  $50k$ , respectively.

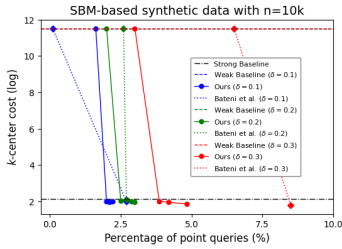

Figure 8:  $k$ -center on SBM dataset with  $n = 10k$

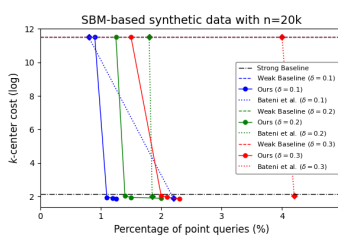

Figure 9:  $k$ -center on SBM dataset with  $n = 20k$

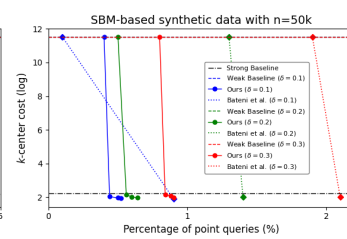

Figure 10:  $k$ -center on SBM dataset with  $n = 50k$

**Performance of  $k$ -center on MNIST dataset:** Next, we describe the performance of our  $k$ -center algorithm on MNIST dataset with SVD and  $t$ -SNE embeddings. Figures 11 and 12 show how the clustering cost varies with the number of point queries when these algorithms are run on MNIST datasets with SVD and  $t$ -SNE embeddings. We run these experiments for  $\delta = 0.1, 0.2$  and  $0.3$ , and the results are given as blue, green and red lines in the Figures 11 and 12. The dash-dotted line corresponds to the baseline computed using the algorithm of Gonzalez [15]. The work [6] does not provide any experimental results for the  $k$ -center problem on the MNIST dataset. In Figure 12, we observe that the  $k$ -center cost with  $\delta = 0.3$  is lower than the costs for  $\delta = 0.1$  and  $\delta = 0.2$ . We

believe this may be due to the nature of the t-SNE embeddings, where the distances between clusters are relatively small. As a result, the distance between two points in the same cluster can be larger than the distance between two points in different clusters. Because of this, the weak oracle might return the distance between two points in the same cluster with a smaller distance.

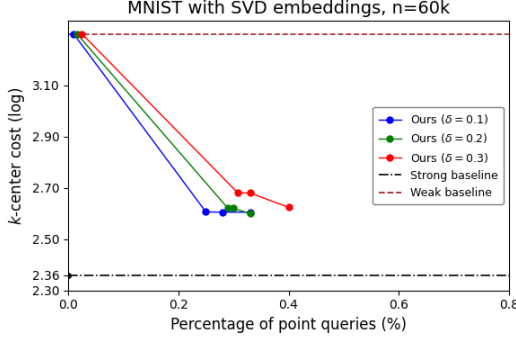

Figure 11:  $k$ -center on MNIST dataset with SVD embeddings with  $n = 60k$

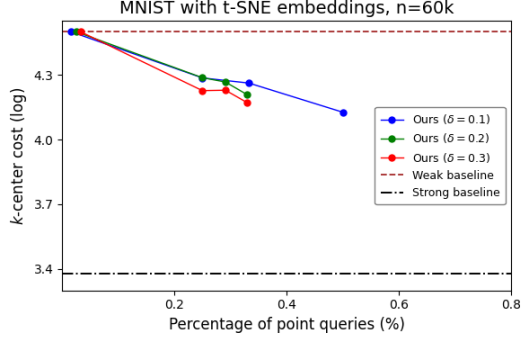

Figure 12:  $k$ -center on MNIST dataset with t-SNE embeddings with  $n = 60k$

| Datasets             | $k$ -center    |                |                | $k$ -means     |                |                |
|----------------------|----------------|----------------|----------------|----------------|----------------|----------------|
|                      | $\delta = 0.1$ | $\delta = 0.2$ | $\delta = 0.3$ | $\delta = 0.1$ | $\delta = 0.2$ | $\delta = 0.3$ |
| SBM, n=10k           | 5.1            | 3.2            | 5.1            | 51.4           | 5.9            | 0.77           |
| SBM, n=20k           | 0              | 3.9            | 1.0            | 7.1            | 6.3            | 11             |
| SBM, n=50k           | 7.8            | 3.9            | 7.8            | 12.7           | 11             | 7.5            |
| MNIST, n=60k (t-SNE) | 2.3            | 0              | 4.0            | 4.4            | 6.5            | 20.0           |
| MNIST, n=60k (SVD)   | 3.2            | 35.0           | 8.4            | 0.3            | 1.3            | 1.0            |

Table 7: Variance of experimental results for  $k$ -center and  $k$ -means clustering problems for different datasets and failure probability values. The values mentioned in the table are to be multiplied by  $10^{-3}$  to obtain the actual variance results.

Table 7 gives the variance results for the experiments we conducted. These results are computed as follows. For both the  $k$ -means and  $k$ -center problems, we first fix the dataset and the value of  $\delta$ . For the number of strong-oracle queries, we vary the constant in the expression for the number of strong-oracle queries, given by  $O\left(\frac{k \log n}{(1/2 - \delta)^2}\right)$ , and select the value that minimizes (number of point queries)  $\times$   $\log(\text{cost of clustering})$  for both  $k$ -means and  $k$ -center. For  $k$ -means, the constant ranges from 0.01 to 3, and for  $k$ -center, from 0.01 to 3.6. For each of these choices, we run our algorithm five times. The average of the clustering costs from these runs is reported as the clustering cost, and the variance across the five runs is shown in Table 7.
